# Supplementary material for: Automated selection of homologs to track the evolutionary history of proteins
Source: BMC Bioinformatics. 2018 Nov 19;19:431. doi: 10.1186/s12859-018-2457-y (PMC6245638; doi:10.1186/s12859-018-2457-y)
Supplement: Supplementary file 1 — List of complete reference proteomes used in the web tool, organised by evolutionary path. (XLSX 13 kb) [file 12859_2018_2457_MOESM1_ESM.xlsx]

## Sheet: Hoja1
Path1	Path2	Path3	Path4	Path5	Path6
From cellular organisms to Homo	From Primates to Homo	From Viridiplantae to Arabidopsis	From Fungi to Schizosaccharomyces	From Bacteria to Escherichia	From Arthropoda to Drosophila
0. Cellular organisms	0. Primates	0. Viridiplantae	0. Fungi	0. Bacteria	0. Arthropoda
Escherichia coli (strain K12) [default]	Otolemur garnettii (Small-eared galago) (Garnett's greater bushbaby) [default]	Volvox carteri f. nagariensis [default]	Rhizopus delemar (strain RA 99-880 / ATCC MYA-4621 / FGSC 9543 / NRRL 43880) (Mucormycosis agent) (Rhizopus arrhizus var. delemar) [default]	Bacillus subtilis (strain 168) [default]	Daphnia pulex (Water flea) [default]
Bacillus subtilis (strain 168)	1. Haplorrhini	Coccomyxa subellipsoidea (strain C-169) (Green microalga)	Encephalitozoon cuniculi (strain GB-M1) (Microsporidian parasite)	Anabaena cylindrica (strain ATCC 27899 / PCC 7122)	Ixodes scapularis (Black-legged tick) (Deer tick)
Synechocystis sp. (strain PCC 6803 / Kazusa)	Callithrix jacchus (White-tufted-ear marmoset) [default]	Ostreococcus lucimarinus (strain CCE9901)	Allomyces macrogynus ATCC 38327	Aquifex aeolicus (strain VF5)	Sarcoptes scabiei (Itch mite) (Acarus scabiei)
Halobacterium salinarum (strain ATCC 700922 / JCM 11081 / NRC-1) (Halobacterium halobium)	2. Catarrhini	Helicosporidium sp. ATCC 50920	Parasitella parasitica	Lactobacillus acidophilus (strain ATCC 700396 / NCK56 / N2 / NCFM)	Strigamia maritima (European centipede) (Geophilus maritimus)
Aquifex aeolicus (strain VF5)	Macaca mulatta (Rhesus macaque) [default]	Ostreococcus tauri	1. Dikarya	Clostridium botulinum (strain Hall / ATCC 3502 / NCTC 13319 / Type A)	Tetranychus urticae (Two-spotted spider mite)
Cytophaga hutchinsonii (strain ATCC 33406 / NCIMB 9469)	Macaca fascicularis (Crab-eating macaque) (Cynomolgus monkey)	Chlorella variabilis (Green alga)	Ustilago maydis (strain 521 / FGSC 9021) (Corn smut fungus) [default]	Deinococcus radiodurans (strain ATCC 13939 / DSM 20539 / JCM 16871 / LMG 4051 / NBRC 15346 / NCIMB 9279 / R1 / VKM B-1422)	Daphnia magna
Planctopirus limnophila (strain ATCC 43296 / DSM 3776 / IFAM 1008 / 290) (Planctomyces limnophilus)	Papio anubis (Olive baboon)	Micromonas commoda (strain RCC299 / NOUM17 / CCMP2709) (Picoplanktonic green alga)	Cryptococcus gattii serotype B (strain R265) (Filobasidiella gattii) (Cryptococcus bacillisporus)	Thermus thermophilus (strain HB8 / ATCC 27634 / DSM 579)	1. Neoptera
Sphaerochaeta globosa (strain ATCC BAA-1886 / DSM 22777 / Buddy) (Spirochaeta sp. (strain Buddy))	Chlorocebus sabaeus (Green monkey) (Cercopithecus sabaeus)	Auxenochlorella protothecoides (Green microalga) (Chlorella protothecoides)	Pseudozyma antarctica (strain T-34) (Yeast) (Candida antarctica)	1. Proteobacteria	Pediculus humanus subsp. corporis (Body louse) [default]
Sulfolobus acidocaldarius (strain ATCC 33909 / DSM 639 / JCM 8929 / NBRC 15157 / NCIMB 11770)	3. Hominoidea	Chlamydomonas reinhardtii (Chlamydomonas smithii)	Cryptococcus neoformans var. neoformans serotype D (strain JEC21 / ATCC MYA-565) (Filobasidiella neoformans)	Helicobacter pylori (strain ATCC 700392 / 26695) (Campylobacter pylori) [default]	Rhodnius prolixus (Triatomid bug)
Korarchaeum cryptofilum (strain OPF8)	Nomascus leucogenys (Northern white-cheeked gibbon) (Hylobates leucogenys) [default]	Micromonas pusilla (strain CCMP1545) (Picoplanktonic green alga)	2. Ascomycota	Sphingomonas sp. WG	Acyrthosiphon pisum (Pea aphid)
1. Eukaryota	4. Hominidae	1. Streptophyta	Saccharomyces cerevisiae (strain ATCC 204508 / S288c) (Baker's yeast) [default]	Desulfovibrio vulgaris (strain Hildenborough / ATCC 29579 / DSM 644 / NCIMB 8303)	Zootermopsis nevadensis (Dampwood termite)
Arabidopsis thaliana (Mouse-ear cress) [default]	Pongo abelii (Sumatran orangutan) (Pongo pygmaeus abelii) [default]	Klebsormidium flaccidum (Filamentous green alga) (Ulothrix flaccida) [default]	Candida glabrata (strain ATCC 2001 / CBS 138 / JCM 3761 / NBRC 0622 / NRRL Y-65) (Yeast) (Torulopsis glabrata)	Acetobacter aceti NBRC 14818	2. Holometabola
Oryza sativa subsp. japonica (Rice)	5. Homininae	2. Embryophyta	Aspergillus niger (strain CBS 513.88 / FGSC A1513)	Neisseria meningitidis serogroup B (strain MC58)	Apis mellifera (Honeybee) [default]
Cyanidioschyzon merolae (strain 10D) (Red alga)	Gorilla gorilla gorilla (Western lowland gorilla) [default]	Physcomitrella patens subsp. patens (Moss) [default]	Ajellomyces capsulatus (strain G186AR / H82 / ATCC MYA-2454 / RMSCC 2432) (Darling's disease fungus) (Histoplasma capsulatum)	Bordetella pertussis	Danaus plexippus (Monarch butterfly)
Thalassiosira pseudonana (Marine diatom) (Cyclotella nana)	6. Hominini	Marchantia polymorpha subsp. polymorpha	Yarrowia lipolytica (strain CLIB 122 / E 150) (Yeast) (Candida lipolytica)	2. Gammaproteobacteria	Atta cephalotes (Leafcutter ant)
Plasmodium falciparum (isolate 3D7)	Pan troglodytes (Chimpanzee) [default]	3. Tracheophyta	Candida albicans (strain SC5314 / ATCC MYA-2876) (Yeast)	Pseudomonas aeruginosa (strain ATCC 15692 / DSM 22644 / CIP 104116 / JCM 14847 / LMG 12228 / 1C / PRS 101 / PAO1) [default]	Solenopsis invicta (Red imported fire ant) (Solenopsis wagneri)
Guillardia theta CCMP2712	7. Homo	Selaginella moellendorffii (Spikemoss) [default]	Emericella nidulans (strain FGSC A4 / ATCC 38163 / CBS 112.46 / NRRL 194 / M139) (Aspergillus nidulans)	Acinetobacter baumannii (strain SDF)	Bombyx mori (Silk moth)
Solanum tuberosum (Potato)	Homo sapiens (Human) [default]	4. Spermatophyta	Magnaporthe oryzae (strain 70-15 / ATCC MYA-4617 / FGSC 8958) (Rice blast fungus) (Pyricularia oryzae)	Vibrio cholerae	Lasius niger (Black garden ant)
Vitis vinifera (Grape)		Picea glauca (White spruce) (Pinus glauca) [default]	Neurospora crassa (strain ATCC 24698 / 74-OR23-1A / CBS 708.71 / DSM 1257 / FGSC 987)	Pseudomonas putida (strain ATCC 47054 / DSM 6125 / NCIMB 11950 / KT2440)	Harpegnathos saltator (Jerdon's jumping ant)
Selaginella moellendorffii (Spikemoss)		5. Magnoliophyta	Gibberella zeae (strain PH-1 / ATCC MYA-4620 / FGSC 9075 / NRRL 31084) (Wheat head blight fungus) (Fusarium graminearum)	Xanthomonas oryzae pv. oryzae (strain KACC10331 / KXO85)	Cerapachys biroi (Ant)
Volvox carteri f. nagariensis		Oryza sativa subsp. japonica (Rice) [default]	3. Taphrinomycotina	Vibrio variabilis	Papilio machaon (Old World swallowtail butterfly)
2. Opisthokonta		Zea mays (Maize)	Taphrina deformans (strain PYCC 5710 / ATCC 11124 / CBS 356.35 / IMI 108563 / JCM 9778 / NBRC 8474) (Peach leaf curl fungus) (Lalaria deformans) [default]	Legionella pneumophila subsp. pneumophila (strain Philadelphia 1 / ATCC 33152 / DSM 7513)	Camponotus floridanus (Florida carpenter ant)
Schizosaccharomyces pombe (strain 972 / ATCC 24843) (Fission yeast) [default]		Sorghum bicolor (Sorghum) (Sorghum vulgare)	Pneumocystis jiroveci (strain SE8) (Pneumocystis pneumonia agent)	3. Enterobacterales	3. Diptera
Saccharomyces cerevisiae (strain ATCC 204508 / S288c) (Baker's yeast)		Musa acuminata subsp. malaccensis (Wild banana) (Musa malaccensis)	Pneumocystis jirovecii RU7	Yersinia pestis [default]	Aedes aegypti (Yellowfever mosquito) (Culex aegypti) [default]
Neurospora crassa (strain ATCC 24698 / 74-OR23-1A / CBS 708.71 / DSM 1257 / FGSC 987)		Oryza punctata (Red rice)	Pneumocystis murina (strain B123) (Pneumocystis carinii f. sp. muris)	Buchnera aphidicola subsp. Acyrthosiphon pisum (strain APS) (Acyrthosiphon pisum symbiotic bacterium)	Anopheles gambiae (African malaria mosquito)
Ustilago maydis (strain 521 / FGSC 9021) (Corn smut fungus)		Oryza rufipogon (Brownbeard rice) (Asian wild rice)	Saitoella complicata NRRL Y-17804	Serratia symbiotica	Anopheles funestus (African malaria mosquito)
Aspergillus niger (strain CBS 513.88 / FGSC A1513)		Oryza glumipatula	4. Schizosaccharomyces	Pantoea vagans (strain C9-1) (Pantoea agglomerans (strain C9-1))	Lutzomyia longipalpis (Sand fly)
Gibberella zeae (strain PH-1 / ATCC MYA-4620 / FGSC 9075 / NRRL 31084) (Wheat head blight fungus) (Fusarium graminearum)		Triticum aestivum (Wheat)	Schizosaccharomyces pombe (strain 972 / ATCC 24843) (Fission yeast) [default]	Erwinia tracheiphila	Aedes albopictus (Asian tiger mosquito) (Stegomyia albopicta)
Encephalitozoon cuniculi (strain GB-M1) (Microsporidian parasite)		Oryza glaberrima (African rice)	Schizosaccharomyces cryophilus (strain OY26 / ATCC MYA-4695 / CBS 11777 / NBRC 106824 / NRRL Y48691) (Fission yeast)	4. Enterobacteriaceae	Anopheles sinensis (Mosquito)
Rhizopus delemar (strain RA 99-880 / ATCC MYA-4621 / FGSC 9543 / NRRL 43880) (Mucormycosis agent) (Rhizopus arrhizus var. Delemar)		Brachypodium distachyon (Purple false brome) (Trachynia distachya)	Schizosaccharomyces japonicus (strain yFS275 / FY16936) (Fission yeast)	Salmonella typhimurium (strain LT2 / SGSC1412 / ATCC 700720) [default]	Anopheles albimanus (New world malaria mosquito)
Magnaporthe oryzae (strain 70-15 / ATCC MYA-4617 / FGSC 8958) (Rice blast fungus) (Pyricularia oryzae)		6. Pentapetalae		Enterobacter sp. (strain 638)	Culex quinquefasciatus (Southern house mosquito) (Culex pungens)
Emericella nidulans (strain FGSC A4 / ATCC 38163 / CBS 112.46 / NRRL 194 / M139) (Aspergillus nidulans)		Solanum tuberosum (Potato) [default]		Klebsiella pneumoniae subsp. pneumoniae (strain ATCC 700721 / MGH 78578)	Phlebotomus papatasi (Sandfly)
3. Metazoa		Genlisea aurea		Salmonella enterica subsp. enterica serovar Alachua str. R6-377	Anopheles darlingi (Mosquito)
Nematostella vectensis (Starlet sea anemone) [default]		Solanum lycopersicum (Tomato) (Lycopersicon esculentum)		Shigella dysenteriae serotype 1 (strain Sd197)	4. Muscomorpha
4. Bilateria		Daucus carota subsp. sativus		Citrobacter youngae ATCC 29220	Glossina fuscipes fuscipes (Riverine tsetse fly) [default]
Drosophila melanogaster (Fruit fly) [default]		Erythranthe guttata (Yellow monkey flower) (Mimulus guttatus)		5. Escherichia	Lucilia cuprina (Green bottle fly) (Australian sheep blowfly)
Caenorhabditis elegans		Beta vulgaris subsp. vulgaris		Escherichia coli (strain K12) [default]	Glossina austeni (Savannah tsetse fly)
Anopheles gambiae (African malaria mosquito)		Spinacia oleracea (Spinach)		Escherichia vulneris NBRC 102420	Glossina morsitans morsitans (Savannah tsetse fly)
Aedes aegypti (Yellowfever mosquito) (Culex aegypti)		7. rosids			Megaselia scalaris (Humpbacked fly) (Phora scalaris)
Apis mellifera (Honeybee)		Vitis vinifera (Grape) [default]			5. Drosophila
Daphnia pulex (Water flea)		Phaseolus vulgaris (Kidney bean) (French bean)			Drosophila melanogaster (Fruit fly) [default]
5. Deuterostomia		Glycine max (Soybean) (Glycine hispida)			Drosophila mojavensis (Fruit fly)
Strongylocentrotus purpuratus (Purple sea urchin) [default]		Populus trichocarpa (Western balsam poplar) (Populus balsamifera subsp. trichocarpa)			Drosophila pseudoobscura pseudoobscura (Fruit fly)
6. Chordata		Ricinus communis (Castor bean)
Ciona intestinalis (Transparent sea squirt) (Ascidia intestinalis) [default]		Cucumis sativus (Cucumber)
Branchiostoma floridae (Florida lancelet) (Amphioxus)		Medicago truncatula (Barrel medic) (Medicago tribuloides)
Oikopleura dioica (Tunicate)		Cajanus cajan (Pigeon pea) (Cajanus indicus)
Ciona savignyi (Pacific transparent sea squirt)		Glycine soja (Wild soybean)
7. Teleostomi		Prunus persica (Peach) (Amygdalus persica)
Danio rerio (Zebrafish) (Brachydanio rerio) [default]		8. malvids
Takifugu rubripes (Japanese pufferfish) (Fugu rubripes)		Theobroma cacao (Cacao) (Cocoa) [default]
8. Sarcopterygii		Citrus sinensis (Sweet orange) (Citrus aurantium var. sinensis)
Latimeria chalumnae (West Indian ocean coelacanth) [default]		Gossypium arboreum (Tree cotton) (Gossypium nanking)
9. Tetrapoda		Eucalyptus grandis (Flooded gum)
Xenopus tropicalis (Western clawed frog) (Silurana tropicalis) [default]		Citrus clementina
10. Amniota		Gossypium raimondii (New World cotton)
Gallus gallus (Chicken) [default]		9. Brassicaceae
Anolis carolinensis (Green anole) (American chameleon)		Brassica oleracea var. oleracea [default]
11. Mammalia		Brassica napus (Rape)
Ornithorhynchus anatinus (Duckbill platypus) [default]		Eutrema salsugineum (Saltwater cress) (Sisymbrium salsugineum)
Monodelphis domestica (Gray short-tailed opossum)		Arabis alpina (Alpine rock-cress)
Sarcophilus harrisii (Tasmanian devil) (Sarcophilus laniarius)		Brassica rapa subsp. pekinensis (Chinese cabbage) (Brassica pekinensis)
12. Eutheria		10. Camelineae
Mus musculus (Mouse) [default]		Capsella rubella [default]
Rattus norvegicus (Rat)		11. Arabidopsis
13. Primates		Arabidopsis thaliana (Mouse-ear cress) [default]
Pongo abelii (Sumatran orangutan) (Pongo pygmaeus abelii) [default]		Arabidopsis lyrata subsp. lyrata (Lyre-leaved rock-cress)
Macaca mulatta (Rhesus macaque)
Macaca fascicularis (Crab-eating macaque) (Cynomolgus monkey)
Chlorocebus sabaeus (Green monkey) (Cercopithecus sabaeus)
Callithrix jacchus (White-tufted-ear marmoset)
Papio anubis (Olive baboon)
Nomascus leucogenys (Northern white-cheeked gibbon) (Hylobates leucogenys)
Gorilla gorilla gorilla (Western lowland gorilla)
Pan troglodytes (Chimpanzee)
Otolemur garnettii (Small-eared galago) (Garnett's greater bushbaby)
14. Homo
Homo sapiens (Human) [default]
